# Supplementary material
Source: PubMed Central journal article supplement (PMC9190123)
Supplement: NIHMS1808067-supplement-1.pdf [file NIHMS1808067-supplement-1.pdf]

# Supplementary Information

## Design, Synthesis, and Pre-clinical Evaluation of Prostate-Specific Membrane Antigen (PSMA)- Targeted $^{99m}\text{Tc}$ -Radioimaging Agents

*Sumith A. Kularatne*<sup>1</sup>

*Zhigang Zhou*<sup>2</sup>

*Jun Yang*<sup>1</sup>

*Carol B. Post*<sup>2</sup>

*Philip S. Low*<sup>1\*</sup>

<sup>1</sup> Department of Chemistry, Purdue University, 560 Oval Drive, West Lafayette, IN 47907.

<sup>2</sup> Department of Medicinal Chemistry, Purdue University, 915 West State Street, W. Lafayette, IN  
47907.

**Author Email Address.** [sumithk@purdue.edu](mailto:sumithk@purdue.edu), [zhougeor@ncbi.nlm.nih.gov](mailto:zhougeor@ncbi.nlm.nih.gov), [Jun.Yang@STJUDE.org](mailto:Jun.Yang@STJUDE.org),  
[cbp@purdue.edu](mailto:cbp@purdue.edu), and [plow@purdue.edu](mailto:plow@purdue.edu)

**Received Date.**

**Title Running Head.** PSMA-targeted radioimaging of prostate cancer.

**Corresponding Author Footnote.** \*Department of Chemistry, Purdue University, 560 Oval Drive,  
West Lafayette, IN 47907; Phone: 765-494-5273; Fax: 765-494-5272; e-mail: [plow@purdue.edu](mailto:plow@purdue.edu)

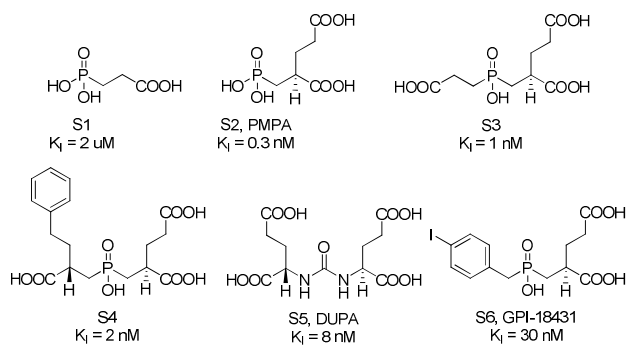

**Supplementary Figure 1** Structures of NAALADase inhibitors<sup>1-3</sup>

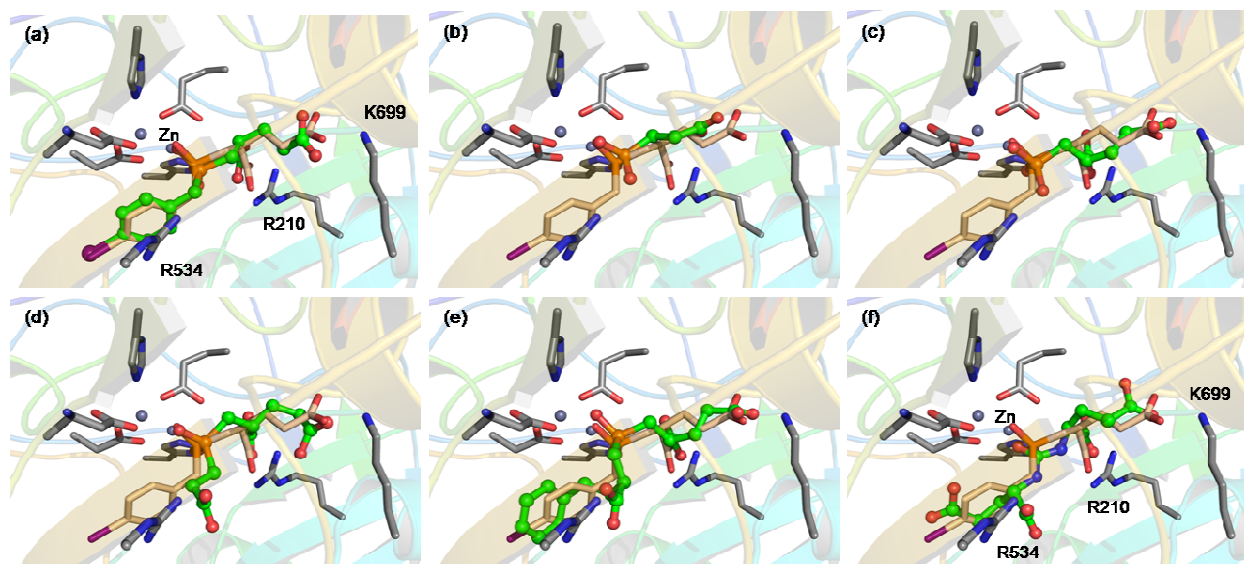

**Supplementary Figure 2** Superimposition of (a) docked GPI-18431, (b) S1, (c) S2, (d) S3, (e) S4, and (f) DUPA with GPI-18431.

## References

- 1) Jackson, P. F.; Slusher, B. S. Design of NAALADase: A novel neuroprotective strategy. *Curr. Med. Chem.* **2001**; 8, 949-957.
- 2) Kozikowski, A. P.; Nan, F.; Conti, P.; Zhang, J.; Ramadan, J. T.; *J. Med. Chem.* **2001**, 44, 298-301.

- 3) Mesters, J. R.; Barinka, C.; Li, W. Structure of glutamate carboxypeptidase II, a drug target in neuronal damage and prostate cancer. *EMBO J.* **2006**, *25*, 1375-1384.
